# Supplementary material for: Association of transcription factor WRKY56 gene from Populus simonii × P. nigra with salt tolerance in Arabidopsis thaliana
Source: PeerJ. 2019 Jul 9;7:e7291. doi: 10.7717/peerj.7291 (PMC6625503; doi:10.7717/peerj.7291)
Supplement: Supplemental Information 1 — A total of 23 different expressed WRKYs in leaf, stem and root of Populus simonii × P. nigra under 200 mmol/L NaCl for 24 h were obtained by RNA-Seq. [file peerj-07-7291-s001.xls]

## Sheet: Sheet3
ID	Definition	Leaf				Stem				Root				Gene ontology
		FPKM-LW	FPKM-SW	Log2FC	FDR	FPKM-SW	FPKM-SS	Log2FC	FDR	FPKM-RW	FPKM-RS	Log2FC	FDR	Cellular component	Molecular function	Biology process
Potri.006G133200	WRKY transcription factor 80	——	——	——	——	——	——	——	——	0	2.37	14.5327	4.96458e-08	——	GO:0003700 transcription factor activity, sequence-specific DNA binding GO:0043565 sequence-specific DNA binding	GO:0006355 regulation of transcription, DNA-templated
Potri.014G050000	WRKY transcription factor 82	1.16	0	-13.502	1.53226e-09	9.23	1.03	-3.16356	1.52419e-05	5.09	1.96	-1.37677	0.0410456	——	GO:0003700 transcription factor activity, sequence-specific DNA binding GO:0043565 sequence-specific DNA binding	GO:0006355 regulation of transcription, DNA-templated
Potri.001G472800	WRKY transcription factor 95	1.8	0	-14.1358	2.72016e-06	3.79	1.88	-1.01143	0.000511695	16.66	3.74	-2.15525	0.038955	——	GO:0003700 transcription factor activity, sequence-specific DNA binding GO:0043565 sequence-specific DNA binding	GO:0006355 regulation of transcription, DNA-templated
Potri.001G352400	WRKY transcription factor 62	1.36	2.84	1.06223	0.01445	——	——	——	——	3.76	135.9	5.17563	0.000596598	——	GO:0003700 transcription factor activity, sequence-specific DNA binding GO:0043565 sequence-specific DNA binding	GO:0006355 regulation of transcription, DNA-templated
Potri.002G138900	WRKY transcription factor 34	——	——	——	——	1.53	0.48	-1.67222	0.000126729	1.48	0.58	-1.35132	0.0031022	——	GO:0003700 transcription factor activity, sequence-specific DNA binding GO:0043565 sequence-specific DNA binding	GO:0006355 regulation of transcription, DNA-templated
Potri.011G007800	WRKY transcription factor 12	5.55	14.38	1.37349	0.000338166	11.8	23.9	1.01822	0.000543148	22.82	492.16	4.43075	0.0211717	——	GO:0003700 transcription factor activity, sequence-specific DNA binding GO:0043565 sequence-specific DNA binding	GO:0006355 regulation of transcription, DNA-templated
Potri.004G007500	WRKY transcription factor 93	23.08	46.51	1.01089	0.0005703	26.46	80.2	1.59979	0.0177806	105.38	1074.62	3.35015	0.00126659	——	GO:0003700 transcription factor activity, sequence-specific DNA binding GO:0043565 sequence-specific DNA binding GO:0044212 transcription regulatory region DNA binding	GO:0010200 response to chitin GO:0016036 cellular response to phosphate starvation GO:0045892 negative regulation of transcription, DNA-templated GO:0080169 cellular response to boron-containing substance deprivation
Potri.016G083600	WRKY transcription factor 70	10.76	5.35	-1.00805	0.00144403	——	——	——	——	——	——	——	——	——	GO:0003700 transcription factor activity, sequence-specific DNA binding GO:0043565 sequence-specific DNA binding	GO:0006355 regulation of transcription, DNA-templated GO:0009957 epidermal cell fate specification GO:0010214 seed coat development
Potri.005G086400	WRKY transcription factor 87	——	——	——	——	2.71	1.28	-1.08209	0.000442131	3.92	1.76	-1.15523	0.0175323	——	GO:0003700 transcription factor activity, sequence-specific DNA binding GO:0043565 sequence-specific DNA binding	GO:0006355 regulation of transcription, DNA-templated
Potri.007G078200	WRKY transcription factor 38	1.27	0.46	-1.46492	0.00075905	2.99	1.41	-1.0844	0.00303181	3.61	0.36	-3.32557	0.00252323	——	GO:0001046 core promoter sequence-specific DNA binding GO:0003700 transcription factor activity, sequence-specific DNA binding	GO:0045893 positive regulation of transcription, DNA-templated GO:1901141 regulation of lignin biosynthetic process GO:1904369 positive regulation of sclerenchyma cell differentiation
Potri.002G059100	WRKY transcription factor 33	——	——	——	——	5.67	2.83	-1.00252	0.0424687	3.96	0	-15.2732	4.61003e-07	——	GO:0003700 transcription factor activity, sequence-specific DNA binding GO:0043565 sequence-specific DNA binding	GO:0006355 regulation of transcription, DNA-templated
Potri.007G047400	WRKY transcription factor 64	37.59	75.48	1.00574	0.0071788	——	——	——	——	——	——	——	——	——	GO:0003700 transcription factor activity, sequence-specific DNA binding GO:0043565 sequence-specific DNA binding	GO:0006355 regulation of transcription, DNA-templated
Potri.002G193000	WRKY transcription factor 56	16.31	145.98	3.16193	0.00758421	——	——	——	——	——	——	——	——	——	GO:0003700 transcription factor activity, sequence-specific DNA binding GO:0043565 sequence-specific DNA binding	GO:0006355 regulation of transcription, DNA-templated GO:0009624 response to nematode GO:0009733 response to auxin
Potri.001G460600	WRKY transcription factor 83	——	——	——	——	6.75	3.3	-1.0324	0.0294324	——	——	——	——	GO:0005634 nucleus	GO:0003700 transcription factor activity, sequence-specific DNA binding GO:0043565 sequence-specific DNA binding	GO:0006355 regulation of transcription, DNA-templated
Potri.018G008500	WRKY transcription factor 26	25.68	55.84	1.12065	0.0044299	——	——	——	——	——	——	——	——	——	GO:0003700 transcription factor activity, sequence-specific DNA binding GO:0005516 calmodulin binding GO:0043565 sequence-specific DNA binding	GO:0006355 regulation of transcription, DNA-templated GO:0010200 response to chitin GO:0042742 defense response to bacterium
Potri.010G147700	WRKY transcription factor 111	1.4	7.55	2.43097	0.00142896	——	——	——	——	57.74	259.05	2.16559	0.000623583	GO:0005634 nucleus	GO:0003700 transcription factor activity, sequence-specific DNA binding GO:0043565 sequence-specific DNA binding	GO:0010200 response to chitin GO:0042742 defense response to bacterium GO:0045893 positive regulation of transcription, DNA-templated
Potri.014G111900	WRKY transcription factor 21	12.85	25.99	1.01618	0.022726	——	——	——	——	——	——	——	——	——	GO:0003700 transcription factor activity, sequence-specific DNA binding GO:0043565 sequence-specific DNA binding	GO:0006355 regulation of transcription, DNA-templated
Potri.006G263600	WRKY transcription factor 25	——	——	——	——	——	——	——	——	227.15	2542.57	3.48457	0.00259226	GO:0005634 nucleus	GO:0003700 transcription factor activity, sequence-specific DNA binding GO:0042802 identical protein binding GO:0043565 sequence-specific DNA binding	GO:0002237 response to molecule of bacterial origin GO:0006355 regulation of transcription, DNA-templated GO:0009751 response to salicylic acid GO:0010200 response to chitin GO:0042742 defense response to bacterium GO:0050691 regulation of defense response to virus by host GO:0050832 defense response to fungus
Potri.014G164300	WRKY transcription factor 53	——	——	——	——	14.82	29.65	1.00048	0.0101101	——	——	——	——	——	GO:0003700 transcription factor activity, sequence-specific DNA binding GO:0008270 zinc ion binding GO:0043565 sequence-specific DNA binding	GO:0009863 salicylic acid mediated signaling pathway GO:0045893 positive regulation of transcription, DNA-templated
Potri.018G139300	WRKY transcription factor 35	——	——	——	——	44.02	88.84	1.01305	0.0190888	——	——	——	——	——	GO:0003700 transcription factor activity, sequence-specific DNA binding GO:0043565 sequence-specific DNA binding GO:1990841 promoter-specific chromatin binding	GO:0006355 regulation of transcription, DNA-templated GO:0009737 response to abscisic acid GO:0009938 negative regulation of gibberellic acid mediated signaling pathway
Potri.004G072000	WRKY transcription factor 32	——	——	——	——	1.67	0.39	-2.09802	0.0138328	——	——	——	——	GO:0005634 nucleus	GO:0003700 transcription factor activity, sequence-specific DNA binding GO:0043565 sequence-specific DNA binding GO:0044212 transcription regulatory region DNA binding	GO:0007263 nitric oxide mediated signal transduction GO:0009739 response to gibberellin GO:0042742 defense response to bacterium GO:0045892 negative regulation of transcription, DNA-templated
Potri.017G149000	WRKY transcription factor 46	——	——	——	——	6.45	0.1	-6.00981	3.84396e-06	——	——	——	——	——	GO:0003700 transcription factor activity, sequence-specific DNA binding GO:0043565 sequence-specific DNA binding	GO:0006355 regulation of transcription, DNA-templated
Potri.019G123500	WRKY transcription factor 96	——	——	——	——	——	——	——	——	66.46	450.79	2.7619	0.0337696	——	GO:0003700 transcription factor activity, sequence-specific DNA binding GO:0043565 sequence-specific DNA binding	GO:0006355 regulation of transcription, DNA-templated
