# Supplementary material for: Association of transcription factor WRKY56 gene from Populus simonii × P. nigra with salt tolerance in Arabidopsis thaliana
Source: PeerJ. 2019 Jul 9;7:e7291. doi: 10.7717/peerj.7291 (PMC6625503; doi:10.7717/peerj.7291)
Supplement: Supplemental Information 5 — The raw data of real-time PCR were applied for data analysis and preparation of Fig. 3 and Table S2. [file peerj-07-7291-s005.xls]

## Sheet: salt stress
	1	2	3	Expression of WRKY56 under salt stress
0h	1	1	1	1±0
6h	1.08	1.16	1	1.08±0.08
12h	9.45	12.64	12.82	11.64±1.90
24h	2.04	3.48	4.59	3.37±1.28
48h	3.03	5.39	6.63	5.02±1.83
72h	4.08	6.06	7.26	5.8±1.60
