# Supplementary material for: Association of transcription factor WRKY56 gene from Populus simonii × P. nigra with salt tolerance in Arabidopsis thaliana
Source: PeerJ. 2019 Jul 9;7:e7291. doi: 10.7717/peerj.7291 (PMC6625503; doi:10.7717/peerj.7291)
Supplement: Supplemental Information 6 — The raw data of growth and physiological traits were applied for data analysis and preparation of Fig. 4 and Tables S3–S4. [file peerj-07-7291-s006.xls]

## Sheet: Fresh Weight
0 mM NaCl	1	2	3	Mean±SD
WT	0.44	0.49	0.52	0.48±0.04
T-1	0.54	0.48	0.49	0.50±0.03
T-2	0.48	0.47	0.43	0.46±0.03
T-3	0.47	0.45	0.42	0.45±0.03
50 mM NaCl	1	2	3	Mean±SD
WT	0.37	0.38	0.43	0.39±0.03
T-1	0.39	0.39	0.35	0.38±0.02
T-2	0.44	0.42	0.4	0.42±0.02
T-3	0.33	0.35	0.37	0.35±0.02
100 mM NaCl	1	2	3	Mean±SD
WT	0.19	0.23	0.24	0.22±0.03
T-1	0.27	0.32	0.33	0.31±0.03
T-2	0.31	0.3	0.28	0.30±0.02
T-3	0.22	0.24	0.25	0.24±0.02
150 mM NaCl	1	2	3	Mean±SD
WT	0.04	0.05	0.06	0.05±0.01
T-1	0.08	0.07	0.06	0.07±0.01
T-2	0.08	0.08	0.1	0.09±0.01
T-3	0.08	0.08	0.07	0.08±0.01

## Sheet: Germination
0 mM NaCl	1	2	3	Mean±SD
WT	100	100	100	100±0
T-1	98.02	95.18	93.14	95.45±2.45
T-2	100	100	100	100±0
T-3	94.82	98.95	99.84	97.87±2.67
50 mM NaCl	1	2	3	Mean±SD
WT	98.82	98.25	94.86	97.31±2.14
T-1	97.88	93.2	91.47	94.18±3.32
T-2	100	100	100	100±0
T-3	98.65	96.49	93.81	96.32±2.42
100 mM NaCl	1	2	3	Mean±SD
WT	70.01	68.73	66.24	68.33±1.92
T-1	87.93	88.6	92.35	89.63±2.38
T-2	83.84	80.83	79.2	81.29±2.35
T-3	91.47	87.97	85.77	88.40±2.87
150 mM NaCl	1	2	3	Mean±SD
WT	54.04	54.89	51.37	53.43±1.84
T-1	76.01	78.3	77.65	77.32±1.18
T-2	77.92	76.06	80.74	78.24±2.36
T-3	78.97	80.23	83.84	81.01±2.53

## Sheet: POD
0 mM NaCl	1	2	3	Mean±SD
WT	6.13	5.86	5.22	5.74±0.47
T-1	22.04	19.02	21.13	20.73±1.55
T-2	5.44	6.48	5.68	5.87±0.54
T-3	9.39	10.83	11.18	10.47±0.95
100 mM NaCl	1	2	3	Mean±SD
WT	6.44	7.64	7.11	7.04±0.60
T-1	25.87	28.16	24.14	26.06±2.02
T-2	13.87	15.09	14.88	14.61±0.65
T-3	17.56	18.93	16.53	17.67±1.20

## Sheet: SOD
0 mM NaCl	1	2	3	Mean±SD
WT	9.72	10.73	9.08	9.84±0.83
T-1	9.68	11.58	10.35	10.54±0.96
T-2	10.54	10.37	11.94	10.95±0.86
T-3	8.89	9.43	10.27	9.53±0.70
100 mM NaCl	1	2	3	Mean±SD
WT	13.75	12.76	11.98	12.83±0.89
T-1	15.17	14.4	13.12	14.23±1.04
T-2	14.73	15.11	15.21	15.02±0.25
T-3	12.52	11.99	14.05	12.85±1.07

## Sheet: Proline
0 mM NaCl	1	2	3	Mean±SD
WT	92.56	88.91	99.89	93.78±5.59
T-1	97.23	82.66	91.12	90.34±7.32
T-2	105.94	92.86	98.97	99.26±6.54
T-3	84.31	92.69	83.89	86.96±4.96
100 mM NaCl	1	2	3	Mean±SD
WT	115.95	103.43	102.65	107.34±7.46
T-1	143.14	140.12	126.05	136.43±9.12
T-2	187.71	180.11	168.05	178.62±9.91
T-3	158.47	159.76	141.93	153.38±9.94

## Sheet: MDA
0 mM NaCl	1	2	3	Mean±SD
WT	16.73	17.93	18.72	17.79±1.00
T-1	16.67	14.4	15.87	15.65±1.15
T-2	15.97	18.15	16.32	16.81±1.17
T-3	19.12	16.81	18.03	17.99±1.16
100 mM NaCl	1	2	3	Mean±SD
WT	20.53	21.88	23.43	21.95±1.45
T-1	16.46	18.57	16.97	17.33±1.10
T-2	17.86	18.24	19.63	18.58±0.93
T-3	18.97	18.89	21.44	19.77±1.45
